# Supplementary material for: Formation of β-(1,3-1,6)-d-glucan-complexed [70]fullerene and its photodynamic activity towards macrophages
Source: Royal Society of Chemistry journal article supplement (doi:10.1039/c6ob02747d), 2017-01-01
Supplement: c6ob02747d1.pdf [file c6ob02747d1.pdf]

## Electronic Supplementary Information

### **Formation of $\beta$ -(1,3-1,6)-D-glucan-complexed [70]fullerene and its photodynamic activity towards macrophages**

Atsushi Ikeda,\* Motofusa Akiyama, Kouta Sugikawa, Kazuya Koumoto,  
Yuta Kashijima, Jiawei Li, Toshio Suzuki and Takeshi Nagasaki\*

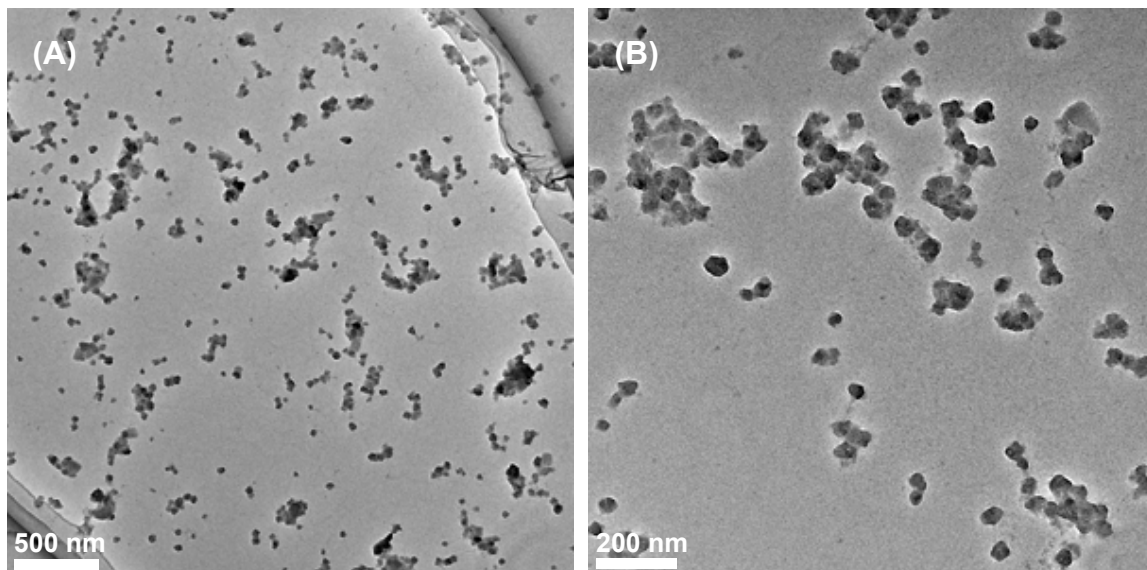

**Fig. S1** TEM images of  $\beta$ -1,3-glucan-complexed C<sub>70</sub> after HSV treatment.
